# Supplementary material for: Plasmonic core–shell nanoparticles for SERS detection of the pesticide thiram: size- and shape-dependent Raman enhancement
Source: Royal Society of Chemistry journal article supplement (doi:10.1039/c4nr06429a), 2015-01-01
Supplement: c4nr06429a1.pdf [file c4nr06429a1.pdf]

## Supporting information

### Plasmonic Core-Shell Nanoparticles for SERS Detection of the Pesticide

#### Thiram: Size- and Shape-Dependent Raman Enhancement

Pengzhen Guo,<sup>a,b,c</sup> Debabrata Sikdar,<sup>d</sup> Xiqiang Huang,<sup>a\*</sup> Kae Jye Si,<sup>b,c</sup> Wei Xiong,<sup>b,c</sup> Shu Gong,<sup>b,c</sup> Lim Wei Yap,<sup>b,c</sup> Malin Premaratne,<sup>a</sup> Wenlong Cheng<sup>b,c\*</sup>,

<sup>a</sup>Department of Physics, Harbin Institute of Technology, Harbin, Heilongjiang Province, 150080, P.R. China

<sup>b</sup>Department of Chemical Engineering, Monash University, Clayton, Victoria 3800, Australia

<sup>c</sup>The Melbourne Centre for Nanofabrication, Clayton, Victoria, 3800, Australia

<sup>d</sup> Advanced Computing and Simulation Laboratory (A $\chi$ L), Department of Electrical and Computer Systems Engineering, Monash University, Clayton 3800, Victoria, Australia.

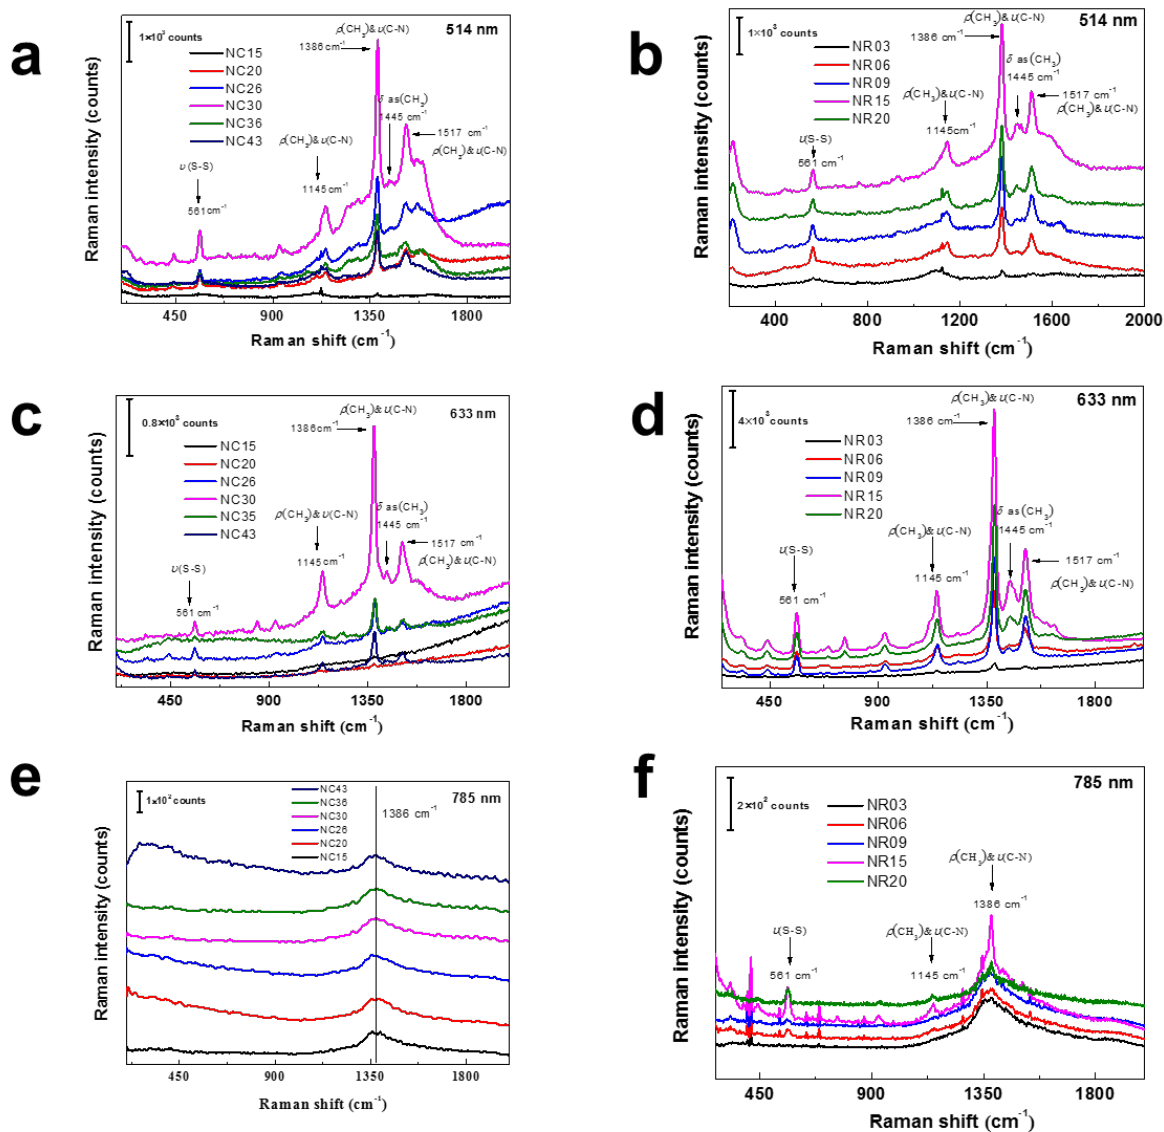

Figure SI-1 Raman spectra of  $1 \times 10^{-6}$  M thiram vs different sizes of NCs and NBs from 514, 633, and 782 nm lasers, with demonstrations of vibrations modes of each SERS peak of thiram.

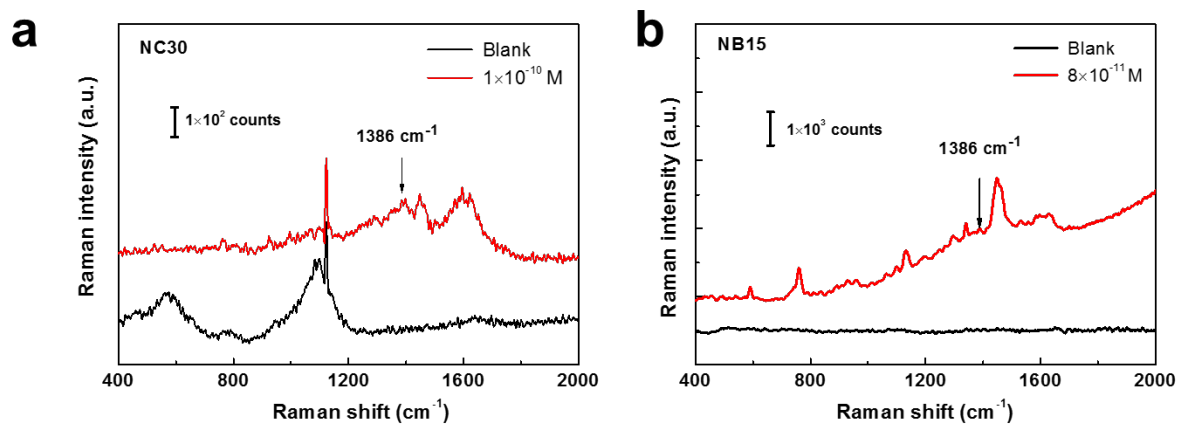

Figure SI-2 The compare of Raman spectra of  $1 \times 10^{-10}$  M thiram and blank. (a) Raman spectra of  $1 \times 10^{-10}$  M thiram based on different sizes of NC30 excited by 514 nm laser, (b) Raman spectra of  $8 \times 10^{-11}$  M thiram based on NB 15 excited by 633 nm laser.

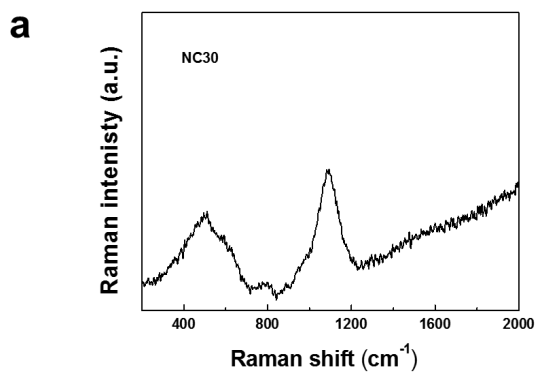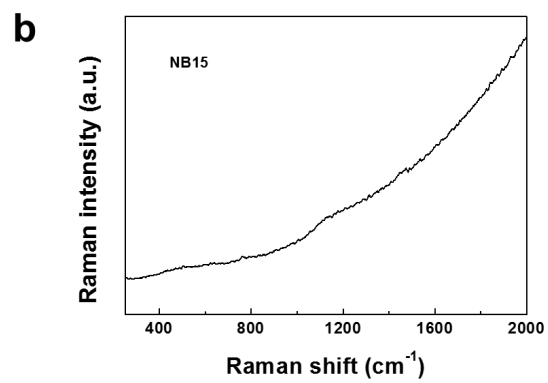

Figure SI-3 The Raman spectra of nanoparticles as the contrast tests: NC30 (a) and NB15(b) without thiram under excitation by 514 and 633 nm lasers, respectively.

**a**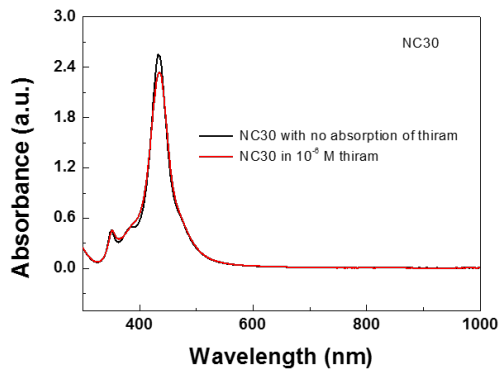**b**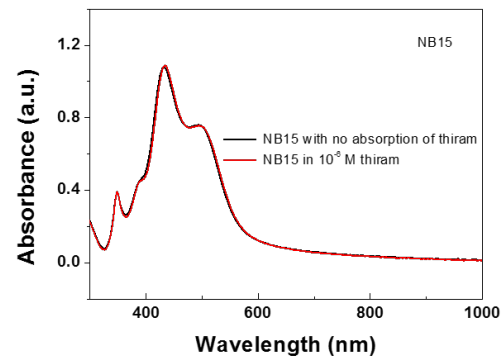

Figure SI-4 The experiments demonstrated that no aggregation of nanoparticles occurred before Raman test. The UV-vis spectra of NC30 (a) and NB15 (b) with/without absorption of thiram, respectively.

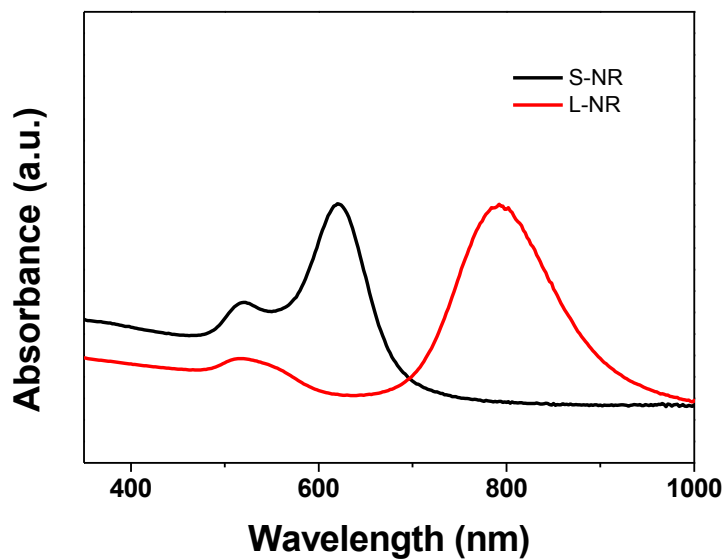

Figure SI-5 The synthesis of longer and shorter Au nanorod as the core to study core-size/shape dependent SERS activity of Au@Ag core/shell nanoparticles. The UV-vis spectra of shorter/longer nanorods (S/L-NR) with aspect ratio of  $\sim 2.2$  and  $\sim 4.1$ , respectively.

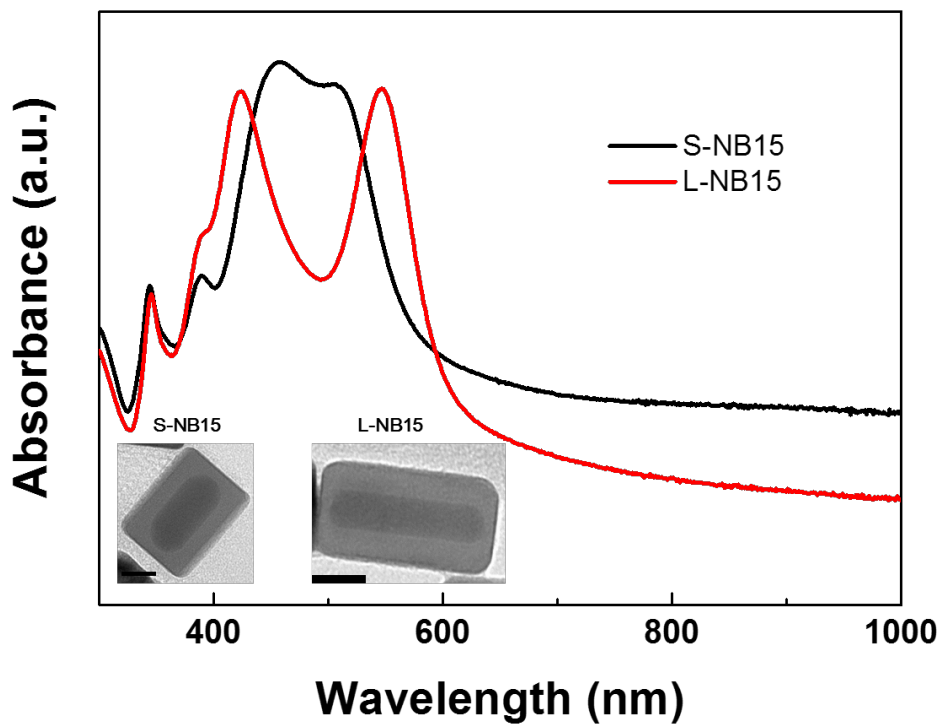

Figure SI-6 The optical spectra of nanocuboids with shorter/longer nanorods as core. The concentration of Au nanorod was same with previous study before Ag coating, and the same amount of Ag was coated. (TEM images are inset with scale bar of 20 nm).

**a**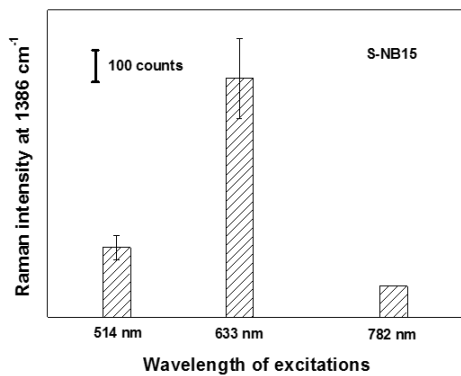**b**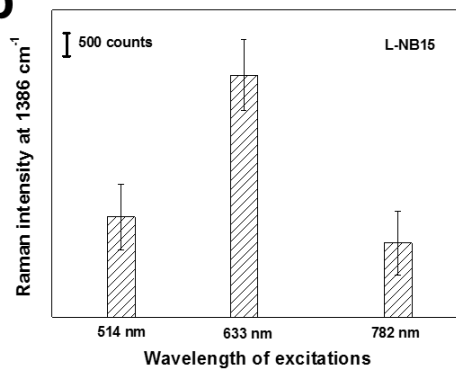

Figure SI-7 The SERS activities of Au@Ag core/shell nanocuboid with shorter and longer Au nanorod core under three different excitations, 514, 633, and 782 nm: S -NB15 (a), and L-NB15 (b).



**a**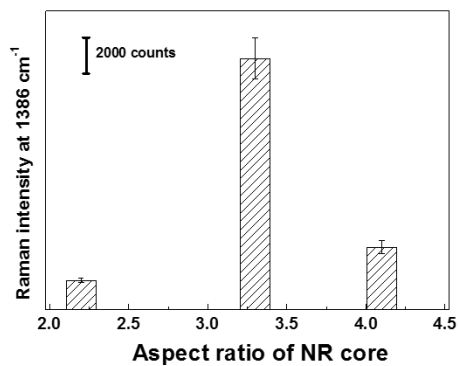**b**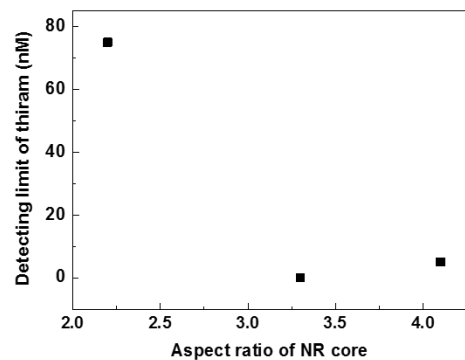

Figure SI-8 The SERS activities studied varying with aspect ratios of Au nanorod core. (a) The Raman intensity of  $10^{-6}$ M thiram at  $1386\text{ cm}^{-1}$  varying with aspect ratio of Au nanorod core: S-NB15, NB 15, and L-NB15, under 633 nm excitations; (b) The detecting limit of thiram based on Au@Ag core/shell nanocuboids varying with aspect ratios of Au nanorod core.
